# Supplementary material for: A nuclear target sequence capture probe set for phylogeny reconstruction of the charismatic plant family Bignoniaceae
Source: Front Genet. 2023 Jan 9;13:1085692. doi: 10.3389/fgene.2022.1085692 (PMC9869424; doi:10.3389/fgene.2022.1085692)
Supplement: Supplementary file 2 [file DataSheet2.XLSX]

## Sheet: selected genes
gene	gene code	Description	A. thaliana ID	gene size	CDS size*	Asteriids	ID	gene size	CDS size*	putative orthologous (1KP) – Big	H. Impetiginosus genome hits	Reference
AGAMOUS	AG	K-box region and MADS-box transcription factor	AT4G18960	5684	717	Solanum lycopersicum	NC_015439.3	5815	750	tu.2071845	few	Bowman et al. 1991 (Development)
AGAMOUS8	AGL8 (FUL)	sequence-specific DNA binding transcription factor	AT5G60910	3836	729	Nicotiana tabacum	NW_015899026.1	7112	735	tu.2079754	multiple	Bowman et al. 1991 (Development)
ALCATRAZ	ALC	basic helix-loop-helix (bHLH) DNA-binding	AT5G67110	1326	838	NA	NA	NA	NA	not found	not found	Toledo-Ortiz et al. 2007 (Plant Cell)
alternative oxidase 1A	AOX1A	alternative oxidase 1A	NA	NA	NA	Solanum lycopersicum	NM_001247188.2	1553	1077	tu.2082868	single	Clifton et al. 2006 (Biochimica et Biophysica Acta)
APETALA1	AP1	K-box region and MADS-box transcription factor	AT1G69120	4056	771	Solanum lycopersicum	NC_015442.3	5570	735	ka.2012105	multiple	Irish & Sussex 1990 (Plant Cell)
APETALA2	AP2	Integrase-type DNA-binding	AT4G36920	2860	1299	NA	NA	NA	NA	tu.2006919	multiple	Bowman et al. 1991 (Development)
APETALA3	AP3	K-box region and MADS-box transcription factor	AT3G54340	2175	699	Solanum lycopersicum	NC_015441.3	3662	687	ka.2067365	multiple	Bowman et al. 1991 (Development)
ALTERED PHLOEM	APL	Homeodomain-like	AT1G79430	2052	1077	NA	NA	NA	NA	tu.2016764	multiple	Bonke et al. 2003 (Nature)
ADP ribosylation factor 3	ARF3	N-terminal protein myristoylation	AT2G24765	2609	549	NA	NA	NA	NA	ma.2000236	few	Muthamilarasan et al. 2016 (Scientific Reports)
ADP ribosylation factor 4	ARF4	sequence-specific DNA binding transcription factor	AT5G60450	4530	2367	NA	NA	NA	NA	ma.2003329	multiple	Muthamilarasan et al. 2016 (Scientific Reports)
BLADE ON PETIOLE 1	BOP1	Ankyrin repeat-containing domain	AT3G57130	2681	1404	NA	NA	NA	NA	tu.2016017	single	Ha et al. 2003 (Development)
CCD4	CCD4	carotenoid cleavage dioxygenase 4-2	AT4G19170	2261	1788	Nicotiana tabacum	KM605433	NA	1806	tu.2084330	few	Wen et al. 2020 (Plant Molecular Biol. Report)
CGS	CGS2	cystathionine gamma-synthase isoform 2	NA	NA	NA	Solanum tuberosum	NW_006239034.1	4518	1623	ka.2004090	few	Oshitani-Okamoto et al. 2001 (DNA Research)
CHS	CHL	chalcone synthase	NA	NA	NA	Solanum lycopersicum	NC_015446.3	2102	1170	tu.2001307	few	Zuk et al. 2016 (Front. in Plant Sci.)
CLAVATA3	CLV3	CLE gene family	AT2G27250	820	291	NA	NA	NA	NA	ma.2005469	single	Brand et al. 2000 (Science)
CONSTANS	CO	B-box type zinc finger protein with CCT domain-containing	AT5G15840	2924	1122	NA	NA	NA	NA	tu.2012604	not found	Putterill et al. 1995 (Cell)
CRTISO	CRTISO	carotenoid isomerase	AT1G06820	3839	1788	Solanum lycopersicum	NC_015447	5265	1848	tu.2005288	single	Soufflet-Freslon et al. 2013 (PLoS ONE)
No Apical Meristem	CUC1	NAC (No Apical Meristem) domain transcriptional regulator	AT3G15170	1827	933	NA	NA	NA	NA	tu.2078271	multiple	Cheng et al. 2012 (New Phytologist)
CYP97A	CYP97A	cytochrome P450, family 97, subfamily A	AT1G31800	3313	1788	Solanum lycopersicum	NC_015441	18730	1818	ka.2016377	few	Stigliani et al. 2011 (Plant & Cell Physiol.)
CYP97C	CYP97C	cytochrome P450-type monooxygenase 97C	NA	NA	NA	Solanum lycopersicum	NC_015447	4579	1644	ka.2014126	single	Stigliani et al. 2011 (Plant & Cell Physiol.)
DFR	DFR	dihydroflavonol 4-reductase	AT5G42800	1940	1149	Solanum lycopersicum	NM_001247479	1651	1140	ka.2001695	not found	Holton & Cornish 2014 (Gene)
DNA demethylase 2	DML2	DNA demethylase 2	NA	NA	NA	Solanum lycopersicum	NC_015447.3	10526	5475	tu.2019465	few	Schumann et al. 2017 (Front. in Plant Science)
ERF6	ERF6	ethylene responsive element binding factor 6	NA	NA	NA	Solanum lycopersicum	NC_015438	2363	765	tu.2016075	few	Dubois et al. 2015 (Plant Physiol.)
ETR4	ETR4	Ehtylene receptor 2-like	NA	NA	NA	Solanum lycopersicum	NC_015443.3	4253	2286	tu.2015313	multiple	Kamiyoshihara et al. 2012 (Plant Physiol.)
F3'5'H	F3'5'H	flavonoid 3'5' hydroxylase	NA	NA	NA	Solanum lycopersicum	NC_015448.3	3362	1536	tu.2019234	single	Seitz et al. 2015 (Planta)
F3'H	F3'H (TT7)	flavonoid 3' hydroxylase	AT5G07990	2810	1542	Vitis vinifera	NC_012023	2561	1530	ma.2071857	few	Seitz et al. 2015 (Planta)
F3H	F3H	flavanone 3-hydroxylase	AT3G51240	1681	1077	Solanum lycopersicum	NC_015439	1938	1089	tu.2000577	few	Seitz et al. 2015 (Planta)
FILAMENTOUS FLOWER	FIL	Plant-specific transcription factor YABBY family	AT2G45190	2528	690	NA	NA	NA	NA	ka.2000048	multiple	Sawa et al. 1999 (Plant Cell)
FLS	FLS	flavonol synthase	AT5G08640	1774	1011	Solanum tuberosum	NW_006239062	5645	1059	ma.2003781	single	Owens et al. 2008 (Plant Physiol.)
FRIGIDA	FRI	NA	AT4G00650	2603	945	NA	NA	NA	NA	not found	multiple	Takada et al. 2019 (Scientific Reports)
FLOWERING LOCUS T	FT	PEBP (phosphatidylethanolamine-binding protein)	AT1G65480	2627	660	NA	NA	NA	NA	ka.2060547	multiple	Takada et al. 2019 (Scientific Reports)
GIBBERELLIN 20-OXIDASE 1	GA20OX1	2-oxoglutarate (2OG) and Fe(II)-dependent oxygenase	AT4G25420	1735	1134	Solanum tuberosum	AJ291453	1512	1137	tu.2000656	few	Carrera et al. 2000 (Plant J.)
GDH1	GDH1	glutamate dehydrogenase 1	AT5G18170	2692	1236	Solanum lycopersicum	NC_015447.3	2692	1236	ma.2017350	few	Melo-Oliveira et al. 1996 (Proc. Natl. Acad. Sci. USA)
GGPP	GGPP	geranylgeranyl diphosphate synthase	NA	NA	NA	Solanum lycopersicum	NC_015446.3	4169	1005	ma.2071705	few	Beck et al. 2013 (Plant Mol. Biol.)
GGPPS	GGPPS	geranylgeranyl pyrophosphate synthase	NA	NA	NA	Solanum lycopersicum	CP023767.1	NA	877	tu.2014823	few	Beck et al. 2013 (Plant Mol. Biol.)
HEXO1	HEXO1	beta-hexosaminidase 1	AT3G55260	4001	1626	NA	NA	NA	NA	ka.2014061	single	Liebminger et al. 2011 (J. Biol. Mol.)
INDEHISCENT	IND	basic helix-loop-helix (bHLH) DNA-binding	AT4G00120	1533	597	NA	NA	NA	NA	not found	not found	Girin et al. 2010 (Plant J.)
IPP	IPP	isopentenyl diphosphate isomerase 1	AT5G16440	2183	876	Solanum lycopersicum	NC_015441	3625	912	ma.2017433	few	Philips et al. 2008 (Plant Cell)
KANADI	KAN	Homeodomain-like DNA binding	AT5G16560	4904	1212	NA	NA	NA	NA	tu.2018810	few	Wu et al. 2008 (Proc. Natl. Acad. Sci. USA)
cytochrome P450	KLU (CYP78A5)	cytochrome P450, family 78, subfamily A, polypeptide 5	AT1G13710	2038	1554	NA	NA	NA	NA	tu.2084344	few	Werck-Reichhart & Feyereisen 2000 (Genome Biol.)
LEAFY	LFY	floral meristem identity control	AT5G61850	2742	1275	Dolichandra unguis-cati	JN182845	NA	286	ka.2017161	few	Weigel et al. 1992 (Cell)
LATERAL ORGAN BOUNDARIES	LOB	Lateral organ boundaries (LOB) domain	AT5G63090	2504	561	Erythranthe guttatus	XM_013000123	NA	286	ma.2008520	few	Shuai et al. 2002 (Plant Physiol.)
lutescent 2	lutescent 2	NA	NA	NA	NA	Solanum lycopersicum	NC_015447	7370	1644	tu.2019017	few	Thorup et al. 2000 (Proc. Natl. Acad. Sci. USA)
LYC	LYC	lycopene cyclase	AT3G10230	1964	1506	Solanum lycopersicum	NC_015441	1838	1503	tu.2019457	few	Cunningham et al. 1996 (Plant Cell)
MADS-RIN	MADS-RIN	MADS-box transcription factor	NA	NA	NA	Capsicum annuum	XM_016691744.1	1559	732	tu.2000619	multiple	Vrebalov et al. 2002 (Science)
hydroquinone glucosyltransferase-like	NA	hydroquinone glucosyltransferase-like	NA	NA	NA	Solanum lycopersicum	NC_029984	1775	1425	tu.2075332	few	Tiwari et al. 2016 (Biotechnol. Adv.)
NAC1	NAC1	NAC domain containing protein 1	AT1G56010	2711	906	Solanum lycopersicum	NC_015441.3	1977	975	tu.2080994	few	Xie et al. 2000 (Genes Dev.)
NCED3	NCED3	nine-cis-epoxycarotenoid dioxygenase 3	AT3G14440	2730	1800	Solanum lycopersicum	GQ222384	NA	740	tu.2014469	few	Iuchi et al. 2001 (Plant J.)
glycosyltransferase	NSGT1	glycosyltransferase	NA	NA	NA	Solanum lycopersicum	NC_015446	NA	376	ka.2062444	few	Tikunov et al. 2013 (Plant Cell)
NXS	NXS	neoxanthin synthase	NA	NA	NA	Solanum tuberosum	NW_006239264	2045	1497	ka.2015011	single	Al-Babili et al. 2000 (FEBS Letters)
OVATE	OVATE	OVATE family protein	NA	NA	NA	Solanum lycopersicum	NC_015439	1673	1059	tu.2081147	few	Wang et al. 2016 (Front. Plant Sci.)
PDS	PDS	phytoene desaturase	AT4G14210	5131	1701	Solanum lycopersicum	NC_015440.3	7680	1944	tu.2084887	few	Qin et al. 2007 (Cell Research)
PEP CARBOXYLASE 1	PEPC1	phosphoenolpyruvate carboxylase 1	AT1G53310	4479	2904	NA	NA	NA	NA	ka.2016274	few	Lohmann 2006 (Am. J. Bot.)
PEP CARBOXYLASE 2	PEPC2	phosphoenolpyruvate carboxylase 2	AT2G42600	4866	2892	Solanum lycopersicum	NC_015444.3	7227	2895	tu.2018209	few	Lohmann 2006 (Am. J. Bot.)
PHANTASTICA	PHAN (AS1)	myb-like HTH transcriptional regulator	AT2G37630	2249	1104	Dolichandra unguis-cati	JN182848	NA	526	ma.2007276	multiple	Kranz et al. 1998 (Plant J.)
PHABULOSA	PHB	Homeobox-leucine zipper/lipid-binding START domain-containing	AT2G34710	5033	2559	NA	NA	NA	NA	ma.2005238	multiple	McConnell et al. 2001 (Nature)
PISTILLATA	PI	K-box region and MADS-box transcription factor	AT5G20240	2612	627	NA	NA	NA	NA	tu.2080169	few	Bowman et al. 1991 (Development)
PIF	PIF3	phytochrome interacting factor 3	AT1G09530	3887	1575	NA	NA	NA	NA	ma.2004216	single	Tepperman & Quail 1998 (Cell)
PIF	PIF4	phytochrome interacting factor 4	AT2G43010	2987	1419	NA	NA	NA	NA	tu.2015082	single	Franklin et al. 2011 (Proc. Natl. Acad. Sci. USA)
PIN-FORMED 1	PIN1	Auxin efflux carrier	AT1G73590	3581	1869	Nicotiana atenuata	XM_019368979.1	NA	897	ka.2012509	few	Krecek et al. 2009 (Genome Biol.)
PIN-FORMED 2	PIN2 (EIR1)	Auxin efflux carrier	AT5G57090	4713	1944	NA	NA	NA	NA	ma.2014548	few	Krecek et al. 2009 (Genome Biol.)
PIN-FORMED 3	PIN3	Auxin efflux carrier	AT1G70940	3530	1923	NA	NA	NA	NA	tu.2005401	few	Krecek et al. 2009 (Genome Biol.)
PSY1	PSY1	phytoene synthase 1	NA	NA	NA	Solanum lycopersicum	NC_015440.3	5141	1239	tu.2019112	single	Bartley et al. 1992 (J. Biol. Chem.)
RABBIT EARS	RBE (RAB)	C2H2 and C2HC zinc fingers	AT5G06070	1037	681	NA	NA	NA	NA	tu.2080024	single	Krizek et al. 2006 (Plant J.)
REVOLUTA	REV	Homeobox-leucine zipper	AT5G60690	5215	2529	NA	NA	NA	NA	tu.2084234	few	Talbert et al. 1995 (Development)
REPLUMLESS	RPL	POX (plant homeobox)	AT5G02030	3559	1728	NA	NA	NA	NA	ka.2017601	few	Roeder et al. 2003 (Curr. Biol.)
SGR	SGR1	senescence-inducible chloroplast stay-green protein 1	NA	NA	NA	Solanum lycopersicum	NC_015445.3	2554	819	ka.2067626	single	Barry et al. 2008 (Plant Physiol.)
AGAMOUS-like 20	SOC1 (AGL20)	sequence-specific DNA binding transcription factor	AT2G45660	3621	645	NA	NA	NA	NA	ma.2012580	multiple	Kim et al. 2003 (Mol. Cells)
SPDSY	SPDSY	spermidine synthase	NA	NA	NA	Solanum lycopersicum	NC_015442	3546	1029	tu.2003043	few	Borner et al. 2000 (Plant J.)
SHOOT MERISTEMLESS	STM	KNOX/ELK homeobox transcription factor	AT1G62360	3482	1149	Dolichandra unguis-cati	JN182851	682	469	not found	multiple	Endrizzi et al. 1996 (Plant J.)
TCP1	TCP1	T-complex protein 1 alpha subunit	AT3G20050	4277	1638	NA	NA	NA	NA	tu.2015404	few	Damerval et al. 2006 (Plant Physiol.)
TCP17	TCP17	TCP domain protein 17	AT5G08070	1678	729	NA	NA	NA	NA	ka.2004277	few	Damerval et al. 2006 (Plant Physiol.)
TCP4	TCP4	TCP family transcription factor 4	AT3G15030	2472	1263	NA	NA	NA	NA	ka.2018212	single	Damerval et al. 2006 (Plant Physiol.)
TCP8	TCP8	TCP family transcription factor 8	AT1G58100	1858	1206	NA	NA	NA	NA	ka.2003605	single	Damerval et al. 2006 (Plant Physiol.)
TERMINAL FLOWER 1	TFL1	PEBP (phosphatidylethanolamine-binding protein)	AT5G03840	1373	534	Nicotiana atenuata	NC_031995	1453	522	ka.2012787	few	Hanano & Goto 2011 (Plant Cell)
TORNADO1	TRN1	unknown function	AT5G55540	4519	4143	Solanum lycopersicum	NM_001302910.1	NA	2425	tu.2084835	single	Cnops et al. 2006 (Plant Cell)
TORNADO2 (TETRASPANIN 1)	TRN2	Tetraspanin family	AT5G46700	2285	810	Coffea arabica	XM_027224652.1	NA	498	ma.2015116	few	Cnops et al. 2006 (Plant Cell)
Tubulin alpha-6	TUA6	Tubulin/FtsZ family	AT4G14960	2079	1353	NA	NA	NA	NA	tu.2002403	multiple	Abe & Hashimoto 2005 (Plant J.)
UF3GT	UF3GT	UDP-glucose:flavonoid 3-o-glucosyltransferase	NA	NA	NA	Capsicum annuum	NC_029986.1	1629	1344	tu.2011273	few	Shan et al. 2009 (J. Exp. Biol.)
VDE	VDE	violaxanthin de-epoxidase	AT1G08550	2702	1368	Solanum lycopersicum	NC_015441	3552	1437	ka.2070471	single	Yamamoto 2006 (Planta
WUSCHEL related	WOX1	WUSCHEL related homeobox 1	AT3G18010	2721	1053	NA	NA	NA	NA	ma.2007493	single	Haecker et al. 2004 (Development)
WUSCHEL	WUS	Homeodomain-like	AT2G17950	1941	879	NA	NA	NA	NA	tu.2007083	single	Lopes et al. 2021 (J. Exp. Bot.)
ENDOXYLOGLUCAN TRANSFERASE;	XTH5	xyloglucan endotransglucosylase/hydrolase 5	AT5G13870	2169	882	Solanum lycopersicum	NC_015438.3	3184	1029	tu.2001540	few	Yin et al. 2002 (Cell)
YABBY1	YAB1 (AFO)	YABBY transcription factor	AT2G45190	2528	690	Solanum lycopersicum	NC_015438.3	3638	729	tu.2016423	few	Kidner 1999 (Trends in Genet.)
YABBY2	YAB2	YABBY transcription factor	AT1G08465	4012	555	Solanum lycopersicum	NC_015448.3	6422	534	ma.2069376	single	Kidner 1999 (Trends in Genet.)
YABBY3	YAB3	YABBY transcription factor	AT4G00180	3032	723	NA	NA	NA	NA	tu.2008217	multiple	Kidner 1999 (Trends in Genet.)
Z-ISO	Z-ISO	15-cis-zeta-carotene isomerase	AT1G10830	2069	1104	Solanum lycopersicum	NC_015449.3	4719	1110	tu.2083036	few	Chen et al. 2010 (Plant Physiol)
ZDS	ZDS	zeta-carotene desaturase	AT3G04870	3933	1677	Solanum lycopersicum	NC_015438.3	8050	1767	tu.2009268	few	Bartley & Ishida 1999 (Plant Physiol.)
ZEP	ZEP	zeaxanthin epoxidase (ZEP) (ABA1)	AT5G67030	3934	2004	Solanum lycopersicum	NC_015439	5523	2010	tu.2018598	few	Barrero et al. 2005 (J. Exp. Bot.)
